# Supplementary material
Source: Springer Nature journal article supplement (https://www.springermedizin.de/resource/supplementary/12889_2012_5657_MOESM4_ESM.pdf/9495896)
Supplement: MOESM4 [file 9495896]

### HYPOTHESIS 1

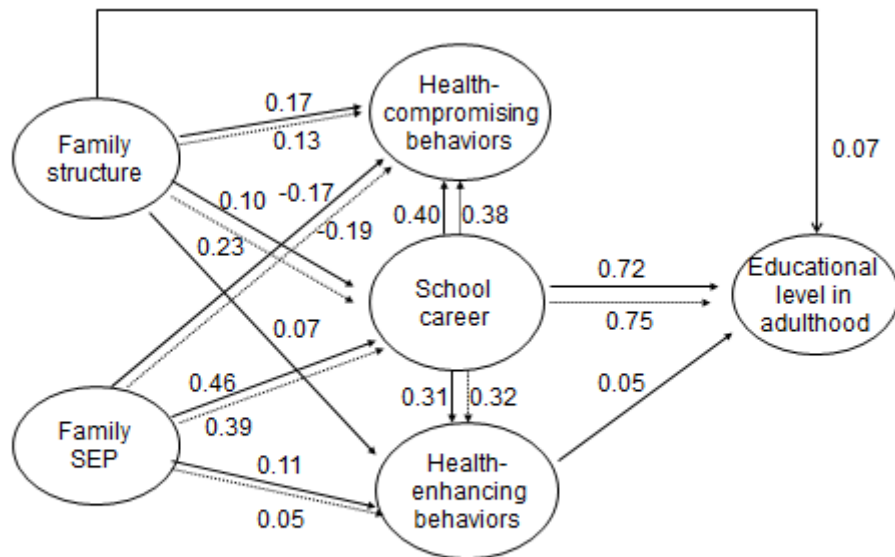

→ Boys aged 16 and 18, RMSEA=0.087

→ Girls aged 16 and 18, RMSEA=0.078

### HYPOTHESIS 2

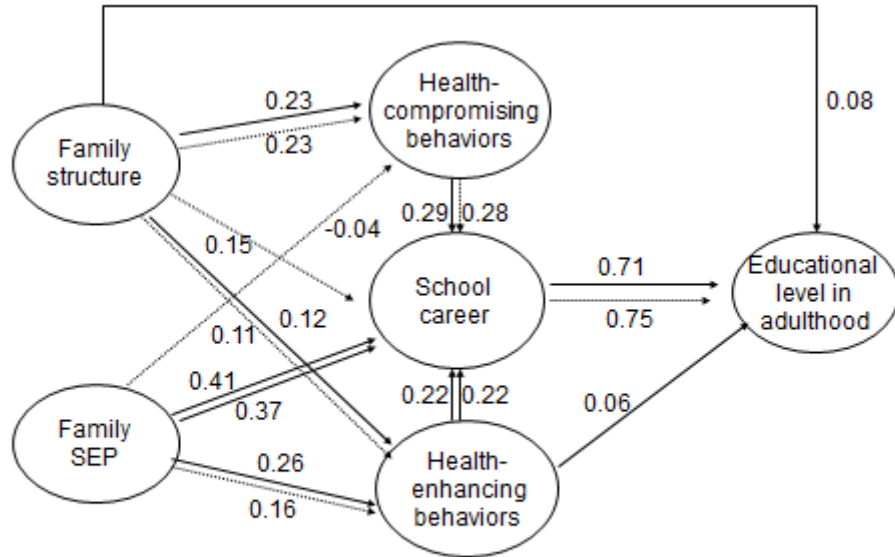

→ Boys aged 16 and 18, RMSEA=0.085

→ Girls aged 16 and 18, RMSEA=0.081
